# Supplementary material for: VBM-Based Alzheimer’s Disease Detection from the Region of Interest of T1 MRI with Supportive Gaussian Smoothing and a Bayesian Regularized Neural Network
Source: MDPI journal article supplement (doi:10.3390/app11136175), 2021-07-02
Supplement: s1 [file s1]

#### Cluster 1

Statistics and Labels: Cluster with peak at (-27 -10.5 -13.5)  
 Voxels in cluster: 79 Peak T: 5.7520 Mean T:  
 5.5069 Std T: 0.1234

| Atlas         | Region      |        |        |
|---------------|-------------|--------|--------|
| Label         | Voxels      | mean T | std of |
| T             |             |        |        |
| aal           | sROI_MNI_V4 |        |        |
| Hippocampus_L | 53          | 5.5327 | 0.1259 |
| Amygdala_L    | 20          | 5.4556 | 0.1059 |

#### Cluster 2

Statistics and Labels: Cluster with peak at (27 -9 -15)  
 Voxels in cluster: 51 Peak T: 5.7472 Mean T:  
 5.4663 Std T: 0.1225

| Atlas         | Region      |        |        |
|---------------|-------------|--------|--------|
| Label         | Voxels      | mean T | std of |
| T             |             |        |        |
| aal           | sROI_MNI_V4 |        |        |
| Hippocampus_R | 25          | 5.4315 | 0.0893 |
| Amygdala_R    | 24          | 5.5113 | 0.1407 |

#### Cluster 3

Statistics and Labels: Cluster with peak at (13.5 -31.5 1.5)  
 Voxels in cluster: 3 Peak T: 5.4526 Mean T:  
 5.3810 Std T: 0.0741

| Atlas       | Region      |        |        |
|-------------|-------------|--------|--------|
| Label       | Voxels      | mean T | std of |
| T           |             |        |        |
| aal         | sROI_MNI_V4 |        |        |
| Calcarine_L | 1           | 5.3046 | 0.0000 |
