# Supplementary material for: VBM-Based Alzheimer’s Disease Detection from the Region of Interest of T1 MRI with Supportive Gaussian Smoothing and a Bayesian Regularized Neural Network
Source: MDPI journal article supplement (doi:10.3390/app11136175), 2021-07-02
Supplement: s1 [file s1]

#### Cluster 1

Statistics and Labels: Cluster with peak at (-25.5 -16.5 -31.5)  
 Voxels in cluster: 944 Peak T: 8.2818 Mean T:  
 6.2593 Std T: 0.4568

| Atlas               | Region      |        |        |  |
|---------------------|-------------|--------|--------|--|
| Label               | Voxels      | mean T | std of |  |
| T                   |             |        |        |  |
| aal                 | sROI_MNI_V4 |        |        |  |
| Hippocampus_L       | 247         | 6.1920 | 0.3964 |  |
| ParaHippocampal_L   | 212         | 6.4757 | 0.6251 |  |
| Amygdala_L          | 208         | 6.0849 | 0.2441 |  |
| Fusiform_L          | 103         | 6.4647 | 0.5286 |  |
| Temporal_Pole_Sup_L | 90          | 6.2633 | 0.2723 |  |
| Olfactory_L         | 22          | 6.1709 | 0.2780 |  |
| Frontal_Inf_Orb_L   | 1           | 5.8314 | 0.0000 |  |

#### Cluster 2

Statistics and Labels: Cluster with peak at (27 -34.5 -6)  
 Voxels in cluster: 354 Peak T: 7.8362 Mean T:  
 6.5767 Std T: 0.5535

| Atlas             | Region      |        |        |  |
|-------------------|-------------|--------|--------|--|
| Label             | Voxels      | mean T | std of |  |
| T                 |             |        |        |  |
| aal               | sROI_MNI_V4 |        |        |  |
| ParaHippocampal_R | 179         | 6.4194 | 0.4744 |  |
| Hippocampus_R     | 145         | 6.7702 | 0.5669 |  |

#### Cluster 3

Statistics and Labels: Cluster with peak at (-25.5 -37.5 -7.5)  
 Voxels in cluster: 5 Peak T: 7.2484 Mean T:  
 6.5982 Std T: 0.5423

| Atlas             | Region      |        |        |  |
|-------------------|-------------|--------|--------|--|
| Label             | Voxels      | mean T | std of |  |
| T                 |             |        |        |  |
| aal               | sROI_MNI_V4 |        |        |  |
| ParaHippocampal_L | 5           | 6.5982 | 0.5423 |  |

#### Cluster 4

Statistics and Labels: Cluster with peak at (-27 -3 -40.5)

Voxels in cluster: 14  
5.8440 Std T: 0.0418

Peak T: 5.9086

Mean T:

| Atlas          | Region      |        |        |  |
|----------------|-------------|--------|--------|--|
| Label          | Voxels      | mean T | std of |  |
| T              |             |        |        |  |
| aal            | sROI_MNI_V4 |        |        |  |
| Fusiform_L     | 12          | 5.8544 | 0.0351 |  |
| Temporal_Inf_L | 2           | 5.7814 | 0.0032 |  |

#### Cluster 5

Statistics and Labels: Cluster with peak at (25.5 0 -19.5)

Voxels in cluster: 33  
5.8032 Std T: 0.0193

Peak T: 5.8433

Mean T:

| Atlas         | Region      |        |        |  |
|---------------|-------------|--------|--------|--|
| Label         | Voxels      | mean T | std of |  |
| T             |             |        |        |  |
| aal           | sROI_MNI_V4 |        |        |  |
| Amygdala_R    | 29          | 5.8039 | 0.0179 |  |
| Hippocampus_R | 4           | 5.7983 | 0.0304 |  |
