# Supplementary material for: VBM-Based Alzheimer’s Disease Detection from the Region of Interest of T1 MRI with Supportive Gaussian Smoothing and a Bayesian Regularized Neural Network
Source: MDPI journal article supplement (doi:10.3390/app11136175), 2021-07-02
Supplement: s1 [file s1]

# Cluster 1

Statistics and Labels: Cluster with peak at (-25.5 -9 -13.5)

Voxels in cluster: 1581 Peak T: 8.8682 Mean T:  
4.8062 Std T: 1.7101

| Atlas               | Region      |        |        |  |
|---------------------|-------------|--------|--------|--|
| Label               | Voxels      | mean T | std of |  |
| T                   |             |        |        |  |
| aal                 | sROI_MNI_V4 |        |        |  |
| Insula_L            | 508         | 3.5646 | 0.3330 |  |
| Amygdala_L          | 256         | 7.6020 | 0.6846 |  |
| Olfactory_L         | 107         | 4.3285 | 0.9015 |  |
| Putamen_L           | 73          | 4.1983 | 0.8898 |  |
| Temporal_Pole_Sup_L | 43          | 6.6091 | 0.6061 |  |
| Hippocampus_L       | 28          | 7.9778 | 0.7215 |  |
| Temporal_Sup_L      | 10          | 3.3340 | 0.1590 |  |
| ParaHippocampal_L   | 6           | 7.2026 | 0.8175 |  |
| Frontal_Sup_Orb_L   | 3           | 3.7681 | 0.0889 |  |
| Pallidum_L          | 3           | 3.5393 | 0.4058 |  |

# Cluster 2

Statistics and Labels: Cluster with peak at (25.5 -9 -13.5)

Voxels in cluster: 908 Peak T: 8.2268 Mean T:  
5.8366 Std T: 1.4433

| Atlas               | Region      |        |        |  |
|---------------------|-------------|--------|--------|--|
| Label               | Voxels      | mean T | std of |  |
| T                   |             |        |        |  |
| aal                 | sROI_MNI_V4 |        |        |  |
| Amygdala_R          | 329         | 6.5708 | 0.9011 |  |
| ParaHippocampal_R   | 138         | 6.9469 | 0.5042 |  |
| Hippocampus_R       | 60          | 7.6221 | 0.3329 |  |
| Olfactory_R         | 46          | 3.8332 | 0.5020 |  |
| Temporal_Pole_Sup_R | 30          | 5.5589 | 0.7427 |  |
| Putamen_R           | 15          | 3.7042 | 0.5025 |  |
| Insula_R            | 12          | 4.0941 | 0.3533 |  |

|            |   |        |        |
|------------|---|--------|--------|
| Pallidum_R | 6 | 3.4483 | 0.3016 |
|------------|---|--------|--------|

#### Cluster 3

Statistics and Labels: Cluster with peak at (15 -31.5 1.5)

|                         |                |         |
|-------------------------|----------------|---------|
| Voxels in cluster: 2126 | Peak T: 6.9762 | Mean T: |
| 4.7878                  | Std T: 0.7126  |         |

| Atlas      | Region      |        |        |
|------------|-------------|--------|--------|
| Label      | Voxels      | mean T | std of |
| T          |             |        |        |
| aal        | sROI_MNI_V4 |        |        |
| Thalamus_R | 1020        | 5.2492 | 0.6611 |
| Thalamus_L | 981         | 4.4001 | 0.4153 |

#### Cluster 4

Statistics and Labels: Cluster with peak at (-24 -21 -15)

|                       |                |         |
|-----------------------|----------------|---------|
| Voxels in cluster: 13 | Peak T: 6.8865 | Mean T: |
| 6.2737                | Std T: 0.3692  |         |

| Atlas         | Region      |        |        |
|---------------|-------------|--------|--------|
| Label         | Voxels      | mean T | std of |
| T             |             |        |        |
| aal           | sROI_MNI_V4 |        |        |
| Hippocampus_L | 13          | 6.2737 | 0.3692 |

#### Cluster 5

Statistics and Labels: Cluster with peak at (21 -13.5 -18)

|                       |                |         |
|-----------------------|----------------|---------|
| Voxels in cluster: 11 | Peak T: 6.7817 | Mean T: |
| 6.4932                | Std T: 0.1545  |         |

| Atlas             | Region      |        |        |
|-------------------|-------------|--------|--------|
| Label             | Voxels      | mean T | std of |
| T                 |             |        |        |
| aal               | sROI_MNI_V4 |        |        |
| ParaHippocampal_R | 7           | 6.4475 | 0.1705 |
| Hippocampus_R     | 4           | 6.5731 | 0.0900 |

#### Cluster 6

Statistics and Labels: Cluster with peak at (-46.5 -36 -22.5)

|                         |                |         |
|-------------------------|----------------|---------|
| Voxels in cluster: 2181 | Peak T: 6.1169 | Mean T: |
| 4.3668                  | Std T: 0.6870  |         |

| Atlas | Region |        |        |
|-------|--------|--------|--------|
| Label | Voxels | mean T | std of |
| T     |        |        |        |

| aal               | sROI_MNI_V4 |        |        |
|-------------------|-------------|--------|--------|
| Temporal_Inf_L    | 1148        | 4.6223 | 0.6231 |
| Fusiform_L        | 490         | 3.9798 | 0.6840 |
| Temporal_Mid_L    | 405         | 4.2446 | 0.6122 |
| Occipital_Inf_L   | 106         | 4.0394 | 0.3865 |
| Occipital_Mid_L   | 25          | 3.7282 | 0.4455 |
| Cerebelum_6_L     | 5           | 3.5292 | 0.2873 |
| ParaHippocampal_L | 1           | 5.8562 | 0.0000 |
| Cerebelum_4_5_L   | 1           | 3.4421 | 0.0000 |

#### Cluster 7

Statistics and Labels: Cluster with peak at (64.5 -31.5 -16.5)  
Voxels in cluster: 678 Peak T: 5.7843 Mean T:  
4.4837 Std T: 0.6875

| Atlas          | Region      |        |        |
|----------------|-------------|--------|--------|
| Label          | Voxels      | mean T | std of |
| T              |             |        |        |
| aal            | sROI_MNI_V4 |        |        |
| Temporal_Inf_R | 440         | 4.3544 | 0.6455 |
| Temporal_Mid_R | 238         | 4.7228 | 0.6999 |

#### Cluster 8

Statistics and Labels: Cluster with peak at (37.5 -22.5 -27)  
Voxels in cluster: 217 Peak T: 5.7655 Mean T:  
4.3687 Std T: 0.6282

| Atlas             | Region      |        |        |
|-------------------|-------------|--------|--------|
| Label             | Voxels      | mean T | std of |
| T                 |             |        |        |
| aal               | sROI_MNI_V4 |        |        |
| Fusiform_R        | 202         | 4.3932 | 0.6176 |
| Cerebelum_4_5_R   | 13          | 3.8604 | 0.5484 |
| ParaHippocampal_R | 2           | 5.2007 | 0.2855 |

#### Cluster 9

Statistics and Labels: Cluster with peak at (-61.5 -48 -4.5)  
Voxels in cluster: 121 Peak T: 5.0312 Mean T:  
4.1984 Std T: 0.4368

| Atlas          | Region      |        |        |
|----------------|-------------|--------|--------|
| Label          | Voxels      | mean T | std of |
| T              |             |        |        |
| aal            | sROI_MNI_V4 |        |        |
| Temporal_Mid_L | 121         | 4.1984 | 0.4368 |

#### Cluster 10

Statistics and Labels: Cluster with peak at (-52.5 -12 -34.5)  
 Voxels in cluster: 3 Peak T: 4.8932 Mean T:  
 4.7967 Std T: 0.1534

| Atlas | Region |        |        |
|-------|--------|--------|--------|
| Label | Voxels | mean T | std of |
| T     |        |        |        |

Voxel not found in atlas(es).

#### Cluster 11

Statistics and Labels: Cluster with peak at (-51 -60 25.5)  
 Voxels in cluster: 270 Peak T: 4.5832 Mean T:  
 3.6541 Std T: 0.3572

| Atlas           | Region      |        |        |
|-----------------|-------------|--------|--------|
| Label           | Voxels      | mean T | std of |
| T               |             |        |        |
| aal             | sROI_MNI_V4 |        |        |
| Angular_L       | 141         | 3.7393 | 0.3656 |
| Temporal_Mid_L  | 121         | 3.5629 | 0.3326 |
| Occipital_Mid_L | 8           | 3.5307 | 0.1677 |

#### Cluster 12

Statistics and Labels: Cluster with peak at (3 -31.5 28.5)  
 Voxels in cluster: 418 Peak T: 4.3849 Mean T:  
 3.6817 Std T: 0.3063

| Atlas           | Region      |        |        |
|-----------------|-------------|--------|--------|
| Label           | Voxels      | mean T | std of |
| T               |             |        |        |
| aal             | sROI_MNI_V4 |        |        |
| Cingulum_Mid_L  | 237         | 3.6708 | 0.2572 |
| Cingulum_Mid_R  | 83          | 3.6736 | 0.3771 |
| Cingulum_Post_L | 67          | 3.6704 | 0.3278 |
| Cingulum_Post_R | 16          | 3.5935 | 0.2659 |
| Precuneus_L     | 3           | 3.4791 | 0.2607 |

#### Cluster 13

Statistics and Labels: Cluster with peak at (54 -45 42)

Voxels in cluster: 54 Peak T: 4.2566 Mean T:  
3.8048 Std T: 0.2895

| Atlas           | Region      |        |        |
|-----------------|-------------|--------|--------|
| Label           | Voxels      | mean T | std of |
| T               |             |        |        |
| aal             | sROI_MNI_V4 |        |        |
| SupraMarginal_R | 43          | 3.8546 | 0.2746 |
| Angular_R       | 8           | 3.6342 | 0.2840 |
| Parietal_Inf_R  | 3           | 3.5458 | 0.2915 |

#### Cluster 14

Statistics and Labels: Cluster with peak at (60 -4.5 -9)

Voxels in cluster: 67 Peak T: 4.2523 Mean T:  
3.4784 Std T: 0.2862

| Atlas          | Region      |        |        |
|----------------|-------------|--------|--------|
| Label          | Voxels      | mean T | std of |
| T              |             |        |        |
| aal            | sROI_MNI_V4 |        |        |
| Temporal_Sup_R | 67          | 3.4784 | 0.2862 |

#### Cluster 15

Statistics and Labels: Cluster with peak at (42 -37.5 -24)

Voxels in cluster: 64 Peak T: 4.1835 Mean T:  
3.5593 Std T: 0.2734

| Atlas      | Region      |        |        |
|------------|-------------|--------|--------|
| Label      | Voxels      | mean T | std of |
| T          |             |        |        |
| aal        | sROI_MNI_V4 |        |        |
| Fusiform_R | 64          | 3.5593 | 0.2734 |

#### Cluster 16

Statistics and Labels: Cluster with peak at (57 9 18)

Voxels in cluster: 100 Peak T: 4.0960 Mean T:  
3.4650 Std T: 0.2715

| Atlas              | Region      |        |        |
|--------------------|-------------|--------|--------|
| Label              | Voxels      | mean T | std of |
| T                  |             |        |        |
| aal                | sROI_MNI_V4 |        |        |
| Frontal_Inf_Oper_R | 86          | 3.4575 | 0.2764 |

|                 |   |        |        |
|-----------------|---|--------|--------|
| Rolandic_Oper_R | 8 | 3.3468 | 0.1030 |
| Precentral_R    | 6 | 3.7304 | 0.1942 |

#### Cluster 17

Statistics and Labels: Cluster with peak at (64.5 -40.5 1.5)  
Voxels in cluster: 20 Peak T: 3.9051 Mean T:  
3.4456 Std T: 0.2164

| Atlas          | Region      |        |        |
|----------------|-------------|--------|--------|
| Label          | Voxels      | mean T | std of |
| T              |             |        |        |
| aal            | sROI_MNI_V4 |        |        |
| Temporal_Mid_R | 20          | 3.4456 | 0.2164 |

#### Cluster 18

Statistics and Labels: Cluster with peak at (15 24 -19.5)  
Voxels in cluster: 39 Peak T: 3.8224 Mean T:  
3.3220 Std T: 0.1544

| Atlas             | Region      |        |        |
|-------------------|-------------|--------|--------|
| Label             | Voxels      | mean T | std of |
| T                 |             |        |        |
| aal               | sROI_MNI_V4 |        |        |
| Frontal_Sup_Orb_R | 18          | 3.3636 | 0.1972 |
| Rectus_R          | 15          | 3.2743 | 0.0956 |
| Olfactory_R       | 6           | 3.3164 | 0.1017 |

#### Cluster 19

Statistics and Labels: Cluster with peak at (-52.5 -52.5 40.5)  
Voxels in cluster: 69 Peak T: 3.7607 Mean T:  
3.3191 Std T: 0.1231

| Atlas          | Region      |        |        |
|----------------|-------------|--------|--------|
| Label          | Voxels      | mean T | std of |
| T              |             |        |        |
| aal            | sROI_MNI_V4 |        |        |
| Parietal_Inf_L | 69          | 3.3191 | 0.1231 |

#### Cluster 20

Statistics and Labels: Cluster with peak at (25.5 -4.5 57)  
Voxels in cluster: 38 Peak T: 3.7381 Mean T:  
3.4518 Std T: 0.1698

| Atlas<br>Label<br>T | Region<br>Voxels | mean T | std of |
|---------------------|------------------|--------|--------|
| aal                 | sROI_MNI_V4      |        |        |
| Frontal_Sup_R       | 35               | 3.4505 | 0.1697 |
| Frontal_Mid_R       | 3                | 3.4663 | 0.2082 |

#### Cluster 21

Statistics and Labels: Cluster with peak at (-21 25.5 49.5)  
 Voxels in cluster: 88 Peak T: 3.6702 Mean T:  
 3.3463 Std T: 0.1220

| Atlas<br>Label<br>T | Region<br>Voxels | mean T | std of |
|---------------------|------------------|--------|--------|
| aal                 | sROI_MNI_V4      |        |        |
| Frontal_Mid_L       | 68               | 3.3709 | 0.1215 |
| Frontal_Sup_L       | 20               | 3.2626 | 0.0808 |

#### Cluster 22

Statistics and Labels: Cluster with peak at (49.5 -52.5 45)  
 Voxels in cluster: 10 Peak T: 3.6080 Mean T:  
 3.3401 Std T: 0.1806

| Atlas<br>Label<br>T | Region<br>Voxels | mean T | std of |
|---------------------|------------------|--------|--------|
| aal                 | sROI_MNI_V4      |        |        |
| Parietal_Inf_R      | 10               | 3.3401 | 0.1806 |

#### Cluster 23

Statistics and Labels: Cluster with peak at (-36 22.5 3)  
 Voxels in cluster: 13 Peak T: 3.4854 Mean T:  
 3.3306 Std T: 0.1027

| Atlas<br>Label<br>T | Region<br>Voxels | mean T | std of |
|---------------------|------------------|--------|--------|
| aal                 | sROI_MNI_V4      |        |        |
| Insula_L            | 11               | 3.3344 | 0.1105 |
| Frontal_Inf_Tri_L   | 2                | 3.3097 | 0.0590 |

#### Cluster 24

Statistics and Labels: Cluster with peak at (-22.5 34.5 42)

Voxels in cluster: 1  
3.4508 Std T: 0.0000

Peak T: 3.4508

Mean T:

| Atlas         | Region      |        |        |
|---------------|-------------|--------|--------|
| Label         | Voxels      | mean T | std of |
| T             |             |        |        |
| aal           | sROI_MNI_V4 |        |        |
| Frontal_Mid_L | 1           | 3.4508 | 0.0000 |

#### Cluster 25

Statistics and Labels: Cluster with peak at (-55.5 -9 4.5)

Voxels in cluster: 1  
3.2596 Std T: 0.0000

Peak T: 3.2596

Mean T:

| Atlas          | Region      |        |        |
|----------------|-------------|--------|--------|
| Label          | Voxels      | mean T | std of |
| T              |             |        |        |
| aal            | sROI_MNI_V4 |        |        |
| Temporal_Sup_L | 1           | 3.2596 | 0.0000 |

#### Cluster 26

Statistics and Labels: Cluster with peak at (48 -31.5 51)

Voxels in cluster: 6  
3.1949 Std T: 0.0422

Peak T: 3.2529

Mean T:

| Atlas         | Region      |        |        |
|---------------|-------------|--------|--------|
| Label         | Voxels      | mean T | std of |
| T             |             |        |        |
| aal           | sROI_MNI_V4 |        |        |
| Postcentral_R | 6           | 3.1949 | 0.0422 |

#### Cluster 27

Statistics and Labels: Cluster with peak at (36 21 1.5)

Voxels in cluster: 38  
3.1871 Std T: 0.0206

Peak T: 3.2398

Mean T:

| Atlas    | Region      |        |        |
|----------|-------------|--------|--------|
| Label    | Voxels      | mean T | std of |
| T        |             |        |        |
| aal      | sROI_MNI_V4 |        |        |
| Insula_R | 38          | 3.1871 | 0.0206 |

#### Cluster 28

Statistics and Labels: Cluster with peak at (52.5 -37.5 49.5)

Voxels in cluster: 1  
3.1995 Std T: 0.0000

Peak T: 3.1995

Mean T:



| Atlas          | Region      |        |        |
|----------------|-------------|--------|--------|
| Label          | Voxels      | mean T | std of |
| T              |             |        |        |
| aal            | sROI_MNI_V4 |        |        |
| Parietal_Inf_R | 1           | 3.1995 | 0.0000 |

#### Cluster 29

Statistics and Labels: Cluster with peak at (-4.5 -52.5 24)

Voxels in cluster: 1      Peak T: 3.1739      Mean T:

3.1739      Std T: 0.0000

| Atlas           | Region      |        |        |
|-----------------|-------------|--------|--------|
| Label           | Voxels      | mean T | std of |
| T               |             |        |        |
| aal             | sROI_MNI_V4 |        |        |
| Cingulum_Post_L | 1           | 3.1739 | 0.0000 |

#### Cluster 30

Statistics and Labels: Cluster with peak at (-48 -34.5 48)

Voxels in cluster: 1      Peak T: 3.1591      Mean T:

3.1591      Std T: 0.0000

| Atlas         | Region      |        |        |
|---------------|-------------|--------|--------|
| Label         | Voxels      | mean T | std of |
| T             |             |        |        |
| aal           | sROI_MNI_V4 |        |        |
| Postcentral_L | 1           | 3.1591 | 0.0000 |
