# Supplementary material for: VBM-Based Alzheimer’s Disease Detection from the Region of Interest of T1 MRI with Supportive Gaussian Smoothing and a Bayesian Regularized Neural Network
Source: MDPI journal article supplement (doi:10.3390/app11136175), 2021-07-02
Supplement: s1 [file s1]

#### Cluster 1

Statistics and Labels: Cluster with peak at (-21 -36 -3)

Voxels in cluster: 121 Peak T: 3.9743 Mean T:  
3.5217 Std T: 0.2223

| Atlas             | Region      |        |        |
|-------------------|-------------|--------|--------|
| Label             | Voxels      | mean T | std of |
| T                 |             |        |        |
| aal               | sROI_MNI_V4 |        |        |
| Hippocampus_L     | 82          | 3.5717 | 0.2273 |
| Lingual_L         | 13          | 3.4586 | 0.2067 |
| ParaHippocampal_L | 11          | 3.4215 | 0.1674 |

#### Cluster 2

Statistics and Labels: Cluster with peak at (19.5 -36 3)

Voxels in cluster: 104 Peak T: 3.9632 Mean T:  
3.5146 Std T: 0.2120

| Atlas         | Region      |        |        |
|---------------|-------------|--------|--------|
| Label         | Voxels      | mean T | std of |
| T             |             |        |        |
| aal           | sROI_MNI_V4 |        |        |
| Hippocampus_R | 53          | 3.5466 | 0.2281 |
| Thalamus_R    | 19          | 3.4174 | 0.1511 |
| Precuneus_R   | 1           | 3.3705 | 0.0000 |

#### Cluster 3

Statistics and Labels: Cluster with peak at (49.5 -51 33)

Voxels in cluster: 4 Peak T: 3.3020 Mean T:  
3.2618 Std T: 0.0333

| Atlas     | Region      |        |        |
|-----------|-------------|--------|--------|
| Label     | Voxels      | mean T | std of |
| T         |             |        |        |
| aal       | sROI_MNI_V4 |        |        |
| Angular_R | 4           | 3.2618 | 0.0333 |

#### Cluster 4

Statistics and Labels: Cluster with peak at (-6 12 36)

Voxels in cluster: 2 Peak T: 3.2527 Mean T:  
3.2427 Std T: 0.0141

| Atlas | Region |        |        |
|-------|--------|--------|--------|
| Label | Voxels | mean T | std of |
| T     |        |        |        |

|                |             |        |        |
|----------------|-------------|--------|--------|
| aal            | sROI_MNI_V4 |        |        |
| Cingulum_Mid_L | 2           | 3.2427 | 0.0141 |

#### Cluster 5

Statistics and Labels: Cluster with peak at (-39 31.5 36)  
 Voxels in cluster: 2 Peak T: 3.2346 Mean T:  
 3.2330 Std T: 0.0022

|               |             |        |        |
|---------------|-------------|--------|--------|
| Atlas         | Region      |        |        |
| Label         | Voxels      | mean T | std of |
| T             |             |        |        |
| aal           | sROI_MNI_V4 |        |        |
| Frontal_Mid_L | 2           | 3.2330 | 0.0022 |

#### Cluster 6

Statistics and Labels: Cluster with peak at (-24 -21 -13.5)  
 Voxels in cluster: 1 Peak T: 3.2022 Mean T:  
 3.2022 Std T: 0.0000

|               |             |        |        |
|---------------|-------------|--------|--------|
| Atlas         | Region      |        |        |
| Label         | Voxels      | mean T | std of |
| T             |             |        |        |
| aal           | sROI_MNI_V4 |        |        |
| Hippocampus_L | 1           | 3.2022 | 0.0000 |

#### Cluster 7

Statistics and Labels: Cluster with peak at (-24 -24 -10.5)  
 Voxels in cluster: 1 Peak T: 3.1986 Mean T:  
 3.1986 Std T: 0.0000

|               |             |        |        |
|---------------|-------------|--------|--------|
| Atlas         | Region      |        |        |
| Label         | Voxels      | mean T | std of |
| T             |             |        |        |
| aal           | sROI_MNI_V4 |        |        |
| Hippocampus_L | 1           | 3.1986 | 0.0000 |
